# Supplementary material for: Different visual manipulations have similar effects on quasi-static and dynamic balance responses of young and older people
Source: PeerJ. 2021 May 11;9:e11221. doi: 10.7717/peerj.11221 (PMC8121054; doi:10.7717/peerj.11221)
Supplement: Supplemental Information 1 — Group 1 = Young subjects, Group 2 = Older subjects, 0 = Interval 0, 1 = Interval 1, 2 = Interval 2, EO = Eyes open, EC = Eyes closed, BG = Blackout glasses, DR = Dark room. [file peerj-09-11221-s001.xlsx]

## Sheet: Table 2 COP Dynamic AP
Subject Nr	Group	ML_Length_0_EO	ML_Length_1_EO	ML_Length_2_EO	AP_Length_0_EO	AP_Length_1_EO	AP_Length_2_EO	ML_Length_0_EC	ML_Length_1_EC	ML_Length_2_EC	AP_Length_0_EC	AP_Length_1_EC	AP_Length_2_EC	ML_Length_0_BG	ML_Length_1_BG	ML_Length_2_BG	AP_Length_0_BG	AP_Length_1_BG	AP_Length_2_BG	ML_Length_0_DR	ML_Length_1_DR	ML_Length_2_DR	AP_Length_0_DR	AP_Length_1_DR	AP_Length_2_DR
1	1	0.811179	3.31976	9.06662	0.781626	5.66053	10.0233	1.63543	2.58386	9.54357	1.66103	6.17581	25.8176	1.36677	2.66257	8.82726	2.38163	6.61227	23.163	1.04716	3.28857	10.5406	1.46352	6.17682	18.8307
2	1	2.16637	2.81339	24.6447	3.28719	6.47787	54.1141	2.78162	2.81407	27.579	3.75308	8.86924	64.8867	1.79326	2.16874	20.4551	3.49801	7.16373	56.9715	3.04774	2.48368	19.9773	10.0591	6.94594	57.8254
3	1	1.80498	3.49263	19.138	1.34152	7.77381	51.5314	1.47657	3.38821	18.9543	3.45778	8.23364	53.0967	2.54442	3.5979	16.1499	1.80165	7.40672	42.3811	2.04564	2.67203	19.4643	1.50721	7.57593	49.9571
4	1	1.59805	3.83554	36.4122	1.2397	5.7009	37.2437	1.64697	3.19818	35.7572	2.29322	5.83554	50.5847	2.32359	3.11681	46.1985	4.45023	5.24352	44.2569	1.08036	3.21702	30.4962	1.43351	5.5501	36.4417
5	1	1.19789	2.3725	11.204	1.63777	9.49888	31.0084	2.80855	2.62004	7.2834	1.82855	10.098	23.9315	1.13677	2.51814	9.88327	3.26315	9.46129	30.1734	1.57228	2.21255	11.1359	2.42093	10.5025	29.9314
6	1	1.08842	2.32641	10.1644	1.7909	6.6483	27.875	1.53819	2.32409	10.5672	1.50273	6.30161	32.0704	1.40831	2.40774	9.78938	1.56098	7.05888	27.2314	0.889662	2.04654	12.2825	1.72561	6.91873	30.8251
7	1	1.32519	2.88986	17.1684	1.81664	7.824	55.27	1.01083	3.0202	16.8059	1.50189	6.98977	53.2514	1.37513	3.62181	13.4658	2.34212	6.81212	49.2584	1.25891	3.03108	13.9798	2.38022	6.65136	51.7365
8	1	1.00449	2.20969	10.465	1.38277	7.68259	18.6118	1.59511	2.34121	11.6897	1.25011	6.77659	19.9499	1.28542	2.68139	14.2021	1.66768	6.30516	22.2665	1.30322	2.51155	18.8361	1.14471	5.61423	27.5185
9	1	1.08023	2.46033	8.09044	1.34441	8.0319	27.3834	0.915455	2.76423	6.63813	1.52281	7.2712	28.3962	1.2428	2.37752	10.1666	1.61904	8.92691	35.1208	1.412	2.04058	11.4367	4.77238	10.237	41.8184
10	1	2.16721	1.65821	11.5431	2.03389	4.43925	31.4743	1.25367	2.61388	10.0794	1.7752	5.45822	30.3491	1.47947	2.42355	12.121	2.08949	4.33179	30.9128	1.54579	2.21534	12.84	1.96094	5.36073	23.8791
11	1	0.700114	2.94252	16.1299	0.994847	6.40533	25.7554	1.59343	2.99609	13.9624	1.07682	6.77322	25.0343	0.950137	3.02255	13.9632	1.19104	6.66403	26.9942	0.876888	2.56634	13.1545	0.792168	6.75683	24.8661
12	1	2.58829	2.70904	8.40265	1.40042	6.62255	42.4779	1.62081	2.77683	10.133	2.33073	7.0282	32.5706	3.00478	2.56785	8.13525	1.47376	6.541	30.9913	2.7527	2.7675	9.61078	1.38061	6.73132	27.8402
13	1	1.05168	3.08826	9.69263	1.04693	5.59498	15.6049	1.21099	2.45293	8.88143	2.03326	5.45323	18.477	1.1662	2.88213	8.2164	1.50928	5.15973	24.3874	1.28718	2.66343	8.62966	1.959	5.98421	27.146
14	1	1.78065	3.23001	9.74174	2.49523	6.83273	40.8448	2.15881	3.82078	9.52553	1.99701	7.17243	42.9075	2.24078	3.11973	7.80567	6.61859	5.72379	35.0749	2.49609	3.41793	10.2802	3.16645	6.6859	53.3352
15	1	0.992884	2.4842	10.3992	1.73636	6.80801	37.2953	1.61606	2.34632	10.5246	1.33625	7.45374	38.965	1.21186	2.36576	9.68257	1.08868	6.51196	36.1672	1.14131	2.26997	11.6365	1.01183	6.73176	38.1636
16	1	0.771394	2.48089	19.1416	1.67898	9.95959	38.3322	1.07003	2.52141	13.2155	2.63812	11.3216	49.8777	0.846905	2.59653	13.9898	1.71598	10.0997	37.3389	0.796411	2.54941	13.7043	1.82669	10.2372	42.8941
17	1	1.26626	2.26229	8.835	2.60512	7.62882	30.151	1.16153	2.46564	11.2957	3.30899	8.28618	41.0128	1.05516	2.81565	8.07685	1.93207	6.99116	26.544	2.41435	2.35071	10.7497	4.83438	7.30945	36.8099
18	1	0.78636	4.25184	12.2122	1.08574	7.91619	15.5336	1.8887	4.80577	13.6313	3.13422	7.67298	15.5891	1.47949	4.03102	10.1248	1.60283	7.30757	15.8087	1.11537	4.67986	23.4847	1.60809	8.12257	16.2484
19	1	0.985621	4.23081	14.7469	1.36876	7.57374	37.09	1.13996	4.34657	19.8626	2.81641	8.17777	39.8109	1.70157	3.88238	18.4669	3.30221	8.22333	47.1953	1.21438	3.82047	13.2538	1.4548	8.37021	38.1701
20	1	1.93146	2.75839	7.57805	0.824375	9.48401	27.4564	1.40245	3.07047	8.25327	1.6026	9.05143	23.2864	2.49614	2.45956	7.15072	3.18324	9.37159	20.9263	2.22674	2.30617	8.93781	1.46455	10.2382	31.7403
21	2	0.684467	3.10688	5.77516	1.95652	10.1275	20.3128	0.878496	3.30954	6.52259	1.41902	10.363	23.8981	1.18196	3.02944	6.4446	1.8773	9.20534	19.4882	0.784325	3.15009	7.95713	2.0677	9.65019	20.7706
22	2	0.858503	2.88492	11.3207	2.25238	6.66586	35.7643	2.4258	2.97758	20.6589	4.13855	8.14324	42.1486	1.82007	3.1948	18.4569	3.10188	6.44014	48.4994	1.53723	2.94333	19.6976	5.42522	5.62338	48.0571
23	2	1.13771	2.84346	15.8279	1.26952	7.29572	39.284	1.31374	2.80997	15.3164	3.83647	7.24337	39.6517	1.37186	2.74415	15.7823	1.78767	7.7073	38.9489	1.65817	2.90419	12.8198	1.91886	6.88253	34.2925
24	2	1.04522	2.38738	8.22651	1.74755	6.68675	29.4173	1.50534	2.42372	7.66631	2.53419	6.58731	35.7218	1.17652	2.5012	6.75472	3.73145	6.8351	37.1766	1.01266	2.40924	6.06026	2.147	6.47578	32.9689
25	2	1.21483	2.68887	13.5584	2.64925	7.06523	36.4394	1.72017	2.7564	25.9531	2.76777	7.17317	47.1608	2.19795	3.13984	16.1417	1.69707	7.77459	39.3105	0.851473	3.04494	19.5623	1.65843	7.62056	42.6266
26	2	1.58297	2.51262	8.69211	1.64179	7.98538	23.1512	2.19808	2.54206	10.7052	2.58455	8.5174	36.2629	1.93646	2.80066	10.7659	1.58394	7.7456	32.5973	1.15717	2.6398	7.44467	1.24388	7.55846	27.9657
27	2	0.718017	3.77496	16.3467	1.53977	6.40398	23.046	0.776135	4.13114	15.5093	1.42297	6.69146	24.2942	1.1457	4.26123	13.5672	1.6075	6.6048	25.6396	0.954535	3.64932	13.7558	1.2795	7.35535	26.2813
28	2	1.67281	2.66759	13.2234	1.26181	7.08327	28.8353	1.45076	2.49272	11.7314	1.8245	7.73501	33.2933	2.51601	2.24646	11.6372	2.45208	6.2388	38.1522	1.71632	2.43806	13.8135	1.8216	6.87142	34.9535
29	2	1.11646	2.8062	18.9323	0.856821	5.48877	23.3081	2.67825	3.14779	19.2692	1.6602	5.18726	28.0292	1.13616	3.05589	16.3505	1.27884	5.18187	24.5413	3.33784	3.44288	16.5416	1.60544	5.97505	28.1055
30	2	0.893297	3.33915	12.7977	1.38144	5.79563	35.2887	0.89701	3.40612	15.0205	1.70339	5.73652	38.078	1.19437	3.24825	13.2099	2.21674	6.33878	39.5965	1.36298	3.19062	11.6115	1.31547	5.90879	39.6184
31	2	1.94716	2.76403	11.4029	2.5208	8.58378	47.4583	2.40118	2.74535	12.7046	4.00774	8.45252	51.6759	2.84888	3.16487	12.117	4.06182	10.0655	52.7591	2.82005	2.73288	15.1226	3.85225	10.4411	51.8258
32	2	1.40628	3.55044	14.9616	2.13224	9.59605	36.4515	1.29723	3.78434	15.5705	1.85614	9.15655	51.3987	1.51292	3.40656	18.5924	1.98528	9.0008	51.5179	1.53053	3.16859	14.5863	2.14412	9.55379	46.2959
33	2	1.78383	2.92297	9.95429	1.60133	6.55289	20.877	2.37457	2.71501	9.81414	1.51967	6.90747	26.332	1.34204	3.10888	12.6377	1.86111	7.32218	29.4325	1.08798	2.61993	10.592	0.99933	7.07979	26.8251
34	2	0.956544	2.52691	14.8631	2.26829	6.73283	42.3927	0.823956	2.99653	17.8002	2.36092	6.70907	42.1522	1.20911	2.50989	14.1234	2.79195	6.92648	47.3533	1.28029	3.03315	18.6448	3.50169	7.73478	49.1433
35	2	0.721217	2.37147	13.7814	1.06848	6.96607	41.9133	1.20916	2.54099	12.9917	2.17194	8.73549	46.4919	0.970049	3.11754	12.4364	1.98796	7.28982	42.5285	0.811196	2.76088	8.821	0.919055	7.23157	36.7947
36	2	1.18014	3.93195	10.334	1.6062	9.221	24.4978	1.37733	3.56842	9.35184	2.91959	9.52836	30.7151	1.11482	3.57035	10.2445	4.46271	8.08148	32.5727	2.96001	3.3197	9.56091	2.00516	9.38343	28.6604
Legend
Group 1=Young
Group 2=Older
0=Interval 0
1=Interval 1
2=Interval 2
EO=Eyes open
EC=Eyes closed
BG=Blackout glasses
DR=Dark room

## Sheet: Table 3 COP Dynamic ML
Subject Nr	Group	ML_Length_0_EO	ML_Length_1_EO	ML_Length_2_EO	AP_Length_0_EO	AP_Length_1_EO	AP_Length_2_EO	ML_Length_0_EC	ML_Length_1_EC	ML_Length_2_EC	AP_Length_0_EC	AP_Length_1_EC	AP_Length_2_EC	ML_Length_0_BG	ML_Length_1_BG	ML_Length_2_BG	AP_Length_0_BG	AP_Length_1_BG	AP_Length_2_BG	ML_Length_0_DR	ML_Length_1_DR	ML_Length_2_DR	AP_Length_0_DR	AP_Length_1_DR	AP_Length_2_DR
1	1	1.15488	6.40838	31.5203	1.04562	2.78788	10.2456	0.729148	6.09254	19.4719	1.1072	2.41518	10.7719	2.41256	5.84441	37.0106	1.04434	2.87992	12.5858	1.58454	6.62784	29.675	1.6694	2.95292	7.13146
2	1	4.04966	5.49746	51.9177	2.19546	1.89201	40.5746	3.93799	5.52008	43.1173	2.27325	2.70615	23.3684	5.33156	5.8951	51.7032	3.86066	2.97123	39.7539	4.27961	5.45856	47.7495	2.53307	2.0873	22.8425
3	1	1.40668	3.41203	64.0232	1.66801	2.7564	16.6381	2.29163	6.05473	64.8741	1.89673	2.81135	12.0852	1.80812	6.33068	80.2616	1.89905	2.43407	18.0329	2.33708	3.73698	75.0721	2.28187	2.70517	17.6309
4	1	1.0425	5.3416	28.1612	1.25428	2.16032	11.5943	2.01497	4.62535	33.0322	1.86046	2.66718	7.72743	1.22081	5.13599	42.3824	1.23094	2.3287	10.2279	0.85957	4.03416	53.359	2.0833	2.81767	21.0732
5	1	3.26751	6.30885	57.2435	2.27573	5.63498	17.7916	1.66079	5.54891	48.8602	1.21941	5.26164	15.8587	1.23431	4.25599	48.3958	1.98194	4.70367	18.657	1.70233	5.1821	47.9571	2.43802	4.44646	19.3906
6	1	1.00509	5.54476	49.7923	1.96316	3.28086	11.9315	1.48193	5.59817	49.883	1.00673	3.35762	9.8728	1.25997	5.98108	42.1006	2.44768	3.94625	10.8754	1.12132	5.35663	44.3877	1.61741	3.04932	10.8536
7	1	1.68111	4.39252	56.5192	1.31588	2.86884	27.742	1.3273	4.66986	69.6348	1.78401	2.91008	19.7432	2.55821	4.54276	70.9157	2.28004	2.67828	39.7679	1.16412	5.1516	73.6924	2.13723	3.39475	25.739
8	1	1.02775	3.82127	37.7516	1.22219	2.91407	10.3088	1.14776	2.86259	39.6141	0.946582	2.30191	7.99671	1.39416	4.81603	36.716	0.948814	2.81282	8.92604	1.62383	4.50449	46.9635	1.1161	2.9367	11.1711
9	1	1.05236	5.47252	55.0023	1.16477	3.71089	14.3323	1.23533	6.31792	53.706	2.5002	4.16091	15.1285	0.94811	4.25557	42.8274	1.22723	3.55474	11.9226	0.801252	4.94985	51.7413	1.34492	3.44649	15.0533
10	1	1.23068	5.3637	37.698	1.41807	2.2229	15.3547	1.9171	4.64887	45.8501	1.86418	1.8539	17.5229	2.16107	4.43712	46.1851	1.51045	2.59304	20.1143	1.67704	4.16999	44.7664	2.33922	2.1936	24.4676
11	1	0.736846	6.15818	54.4693	0.909504	3.64207	21.2867	1.0452	6.55576	54.6321	2.04483	4.12854	22.8592	0.931743	6.91524	54.0448	1.37322	3.56558	18.9132	0.919669	6.76658	53.4815	1.48182	3.32553	21.7795
12	1	1.12379	7.34803	55.2074	1.73518	2.75914	13.1225	2.64744	6.41724	45.2318	2.3236	3.05031	16.618	2.81985	7.24527	59.9	2.02806	3.21381	18.2189	2.4255	8.18504	48.2989	2.66584	3.2009	16.4677
13	1	1.23076	5.37691	19.5942	1.91923	3.20037	14.6117	1.37879	5.5727	28.9371	1.93067	2.76698	17.4606	1.65617	5.44408	18.6234	3.23952	3.93326	17.3665	1.9015	4.90255	24.8869	1.60362	3.48773	17.8706
14	1	1.67396	6.66605	39.1524	2.61543	3.72021	22.2493	2.67336	6.91582	44.3239	2.13536	3.69266	23.186	3.43439	6.59724	39.1902	3.2078	3.80852	15.9722	1.83957	6.77668	54.7689	3.88697	3.32322	26.4556
15	1	1.20213	5.45245	41.7353	1.29472	3.06343	14.4526	1.21583	6.14892	42.305	1.22316	3.89659	17.4126	1.48491	4.0531	40.8069	1.92042	2.79072	15.9283	1.67053	4.50145	41.4208	2.30399	2.65522	16.4508
16	1	1.14665	5.66193	48.0691	3.52873	3.75022	12.128	1.37483	5.44301	52.4088	2.81257	3.50794	16.8102	1.03542	5.70983	44.7305	2.24217	3.26006	11.8512	1.11721	5.99174	58.3766	2.52246	3.5084	14.7301
17	1	1.71245	6.04358	39.7208	1.79179	3.50037	14.3813	1.44696	5.4425	42.0482	2.2528	3.79385	12.3136	1.2465	6.18552	42.6418	2.68798	3.28465	15.8405	1.84865	5.35324	40.0377	1.79032	3.29865	14.8931
18	1	0.960359	4.58319	39.457	2.16947	2.84486	19.5418	1.28253	4.91257	47.4155	2.03196	3.15343	25.2268	1.05884	4.56694	46.6967	1.76231	2.89818	18.5874	1.07478	5.7686	57.7235	2.24548	2.98263	21.6984
19	1	0.85024	8.4888	47.0824	1.27122	4.19764	15.638	2.28982	8.28159	72.1668	3.54757	4.58681	24.5443	1.71906	8.39375	77.1936	2.88283	4.4829	14.8417	1.49141	7.31388	67.842	2.45065	3.95081	19.142
20	1	1.34757	6.67837	39.5624	1.32894	2.55845	13.0305	1.22039	7.02764	49.1586	2.7537	2.57858	10.8263	2.50297	5.69868	42.7322	3.78554	2.76166	16.4653	1.06268	6.3515	44.4901	3.47581	3.0091	16.4176
21	2	1.04543	4.68192	25.2923	2.51368	2.6273	10.7623	0.671267	5.10352	26.252	1.88181	2.25491	11.0367	1.09919	4.39475	28.0452	1.77828	2.25051	9.02421	1.03534	4.36493	32.3577	1.97283	2.39405	10.5836
22	2	3.14284	5.06674	62.1282	3.70552	3.26272	23.2164	1.61116	5.16965	51.1826	3.14269	4.25628	20.787	2.18805	4.8479	56.4584	8.61948	4.22214	12.858	1.06747	5.00953	50.9269	4.76037	3.82149	18.4115
23	2	0.860804	5.89859	36.923	1.10823	3.87663	27.7979	1.88193	5.17869	37.4795	2.23043	4.5413	26.7435	1.70372	5.68423	37.5104	3.19259	3.34385	28.6762	2.12893	6.74254	59.014	2.48469	3.27192	51.929
24	2	1.18169	5.54117	26.3114	1.8283	4.34944	16.6807	1.24056	6.55201	34.2929	2.95873	4.60974	15.8124	1.30017	4.22327	33.4652	2.21383	5.33328	18.6789	2.83431	4.60457	41.3125	7.45712	4.06728	15.8607
25	2	1.70705	5.34641	44.2864	2.90434	2.92956	21.5067	0.949112	5.13981	45.4628	1.57826	2.83854	22.1172	1.09441	4.94086	46.8626	3.28744	2.61394	17.3544	1.39397	5.57038	52.0791	2.50415	3.08435	14.53
26	2	1.52375	5.81799	23.0328	1.96183	2.98297	9.62721	2.71038	5.79749	22.3861	2.15229	3.39182	8.91833	2.47641	4.22027	24.5758	2.41046	2.71988	9.85215	2.57705	5.73334	24.9982	1.62966	3.12227	10.6476
27	2	0.712037	5.74416	32.5098	1.41196	2.74721	10.7392	0.892923	5.28881	39.4373	0.951333	3.04031	15.98	1.13275	5.95177	37.3526	1.13831	2.72134	10.9099	0.823636	6.30438	33.2512	1.7581	2.50758	9.30162
28	2	1.24909	5.51048	34.9372	2.1725	3.28095	15.2168	1.1763	4.53587	34.9738	1.97272	2.84316	18.2759	2.54833	4.81169	39.7237	2.85769	3.07916	18.7709	1.52192	4.5947	34.3622	2.67156	3.27406	17.5797
29	2	0.816162	5.58024	26.9546	1.30465	2.57632	14.3842	1.27837	4.62257	36.6854	2.87853	2.73037	16.8784	0.974491	5.13756	38.0022	4.03514	2.9098	16.9334	1.54813	4.92994	36.0805	1.38148	2.61698	18.2786
30	2	0.953459	5.55019	26.8336	0.808178	3.29766	15.6185	2.4737	4.21581	33.4438	2.74721	3.51833	15.7435	0.775085	5.47304	30.6121	1.52541	3.38283	14.9642	1.97935	5.73091	40.0354	2.60727	3.44291	16.1804
31	2	2.8897	3.58072	48.817	2.12979	3.52586	20.6158	2.56425	5.08147	48.861	2.84295	3.33057	20.0809	1.75748	4.83788	57.9215	2.16827	3.23657	22.134	5.21479	5.24466	56.8132	2.55124	3.25758	23.3009
32	2	1.56061	4.29715	42.7	1.58477	3.07285	29.5553	2.51238	5.10245	49.5661	2.08095	2.9069	34.0605	1.22377	5.85999	49.8871	2.77195	3.35687	23.3838	1.54408	5.01708	41.3442	2.63365	3.38189	21.0594
33	2	1.10586	5.31202	38.4542	1.76148	2.85383	13.7041	1.24336	5.52917	33.7219	2.60203	2.65016	11.5928	1.13701	5.34766	36.8093	0.918444	2.62316	14.7502	1.0016	5.18217	34.756	2.40794	2.63268	14.3127
34	2	1.61082	5.31503	49.28	2.48029	3.12558	13.2374	1.05057	7.00098	63.4417	2.01906	4.27914	19.0479	1.98567	7.45012	64.2238	4.18388	3.65558	18.2911	1.38895	5.30517	62.7334	2.48132	3.25144	13.9834
35	2	0.81037	5.30782	40.8651	1.11066	3.22536	10.2987	1.07545	5.93344	47.7097	1.81176	3.11097	12.5116	0.844257	6.01584	57.6349	1.79241	3.35333	15.1444	0.951442	5.73652	50.0834	2.29232	3.39224	15.1265
36	2	1.38171	6.12393	28.5298	1.63171	4.35053	12.2344	1.66634	6.45381	25.6766	4.21061	3.91142	10.537	0.711219	8.42754	33.3378	3.16006	4.21587	11.4613	3.15319	5.86332	29.5328	2.27427	4.0829	11.3271
Legend
Group 1=Young
Group 2=Older
0=Interval 0
1=Interval 1
2=Interval 2
EO=Eyes open
EC=Eyes closed
BG=Blackout glasses
DR=Dark room

## Sheet: Fig 2 COP Static
Subject Nr	Group	COP_Total_EO	COP_Total_EC	COP_Total_BG	COP_Total_DR	ML_Length_EO	ML_Length_EC	ML_Length_BG	ML_Length_DR	AP_Length_EO	AP_Length_EC	AP_Length_BG	AP_Length_DR
1	1	149.301	177.785	173.037	166.888	94.6334	107.878	105.986	105.89	94.8065	116.929	112.648	106.446
2	1	182.502	260.629	254.17	219.896	118.408	174.542	162.777	148.927	113.288	157.114	160.278	130.7
3	1	219.106	233.639	231.263	233.732	139.662	160.874	147.803	157.798	138.428	136.574	145.714	139.782
4	1	180.874	259.433	235.899	222.073	117.502	174.728	158.266	146.595	111.463	153.727	138.587	134.898
5	1	188.82	247.462	173.203	211.426	116.168	149.36	116.581	139.527	123.396	164.269	103.087	128.215
6	1	162.321	209.16	184.946	175.945	105.649	131.791	131.69	115.301	100.662	132.851	102.162	107.916
7	1	157.147	185.26	231.919	208.867	111.461	132.126	166.744	156.792	87.4371	102.898	127.623	106.308
8	1	212.643	272.319	266.786	262.599	122.597	141.337	128.496	140.199	147.736	202.993	205.875	193.49
9	1	163.025	168.939	187.828	199.275	97.7883	102.199	112.922	118.303	109.073	112.571	125.46	134.243
10	1	151.43	156.488	172.493	170.953	108.158	110.534	127.945	122.006	83.8852	88.0698	89.7015	94.5508
11	1	241.065	237.61	257.215	239.269	138.596	151.087	171.738	152.386	165.879	149.842	154.687	151.459
12	1	130.121	131.767	134.938	133.216	84.3731	88.2297	89.5238	86.8994	81.2467	79.5501	82.2308	82.779
13	1	162.862	200.564	174.556	181.209	95.936	119.941	104.302	111.216	110.608	133.882	117.325	119.449
14	1	181.048	221.005	250.329	238.737	128.734	166.587	192.651	179.577	100.802	111.683	120.795	120.088
15	1	166.827	196.177	206.33	230.162	108.323	146.846	136.211	149.175	104.249	100.933	126.742	143.077
16	1	181.363	247.662	230.106	261.431	137.298	209.936	191.714	218.632	90.931	94.6963	92.1382	103.172
17	1	239.414	311.533	306.052	289.063	166.606	237.237	235.537	224.237	136.443	152.168	145.01	137.273
18	1	135.632	141.096	146.647	142.211	87.6143	95.8557	99.7414	94.8463	84.8881	83.2543	86.6326	86.0914
19	1	132.719	159.162	145.679	154.5	97.7292	125.743	111.722	118.349	69.9371	73.6223	72.3698	75.9235
20	1	141.578	178.354	193.683	213.834	101.448	135.05	153.213	172.412	77.9956	88.8048	87.5633	92.7391
21	2	163.833	236.667	233.31	211.583	133.679	204.72	202.879	182.288	69.0782	83.1326	82.142	75.3517
22	2	233.752	375.49	397.048	348.907	192.982	314.533	327.721	273.426	97.3638	149.074	163.369	162.886
23	2	177.002	235.924	241.06	262.865	124.002	181.688	186.154	194.4	100.363	115.018	115.722	137.313
24	2	217.027	339.261	304.81	339.773	173.385	288.528	248.139	260.49	99.162	129.23	131.526	168.075
25	2	127.068	199.544	188.55	178.899	87.4331	142.633	142.439	121.935	74.1896	110.141	96.4	103.677
26	2	141.118	167.123	158.562	147.635	103.546	126.082	121.281	109.617	74.4673	84.7359	79.05	77.0516
27	2	186.364	270.592	275.725	246.126	131.667	204.863	210.115	184.019	105.218	137.227	137.527	127.42
28	2	204.41	279.838	246.223	259.016	121.87	170.391	147.949	149.765	137.872	185.226	164.956	179.981
29	2	147.728	178.065	177.06	185.646	102.688	128.856	126.688	136.965	85.0836	96.6464	98.4685	98.0734
30	2	165.954	258.903	265.806	239.524	120.793	199.761	197.925	169.69	89.2189	125.11	137.364	133.725
31	2	228.523	240.726	264.817	289.292	164.798	174.428	198.053	202.497	126.157	130.551	136.992	166.213
32	2	152.151	168.72	164.796	151.505	103.901	118.639	119.026	103.532	90.1504	95.9395	90.2537	88.9974
33	2	142.19	175.042	166.757	197.104	98.6355	129.422	119.817	130.679	82.4829	92.1521	91.8533	120.162
34	2	139.901	210.234	186.942	167.166	107.487	175.844	146.138	138.052	68.5827	82.9996	88.4126	69.2784
35	2	168.714	242.729	241.492	228.044	112.298	183.948	194.836	177.493	101.879	120.485	106.336	108.119
Legend
Group 1=Young
Group 2=Older
EO=Eyes open
EC=Eyes closed
BG=Blackout glasses
DR=Dark room

## Sheet: EMG Dynamic AP
Subject Nr	Group	rms0_TA_EO	rms0_Gm_EO	rms1_TA_EO	rms1_Gm_EO	rms2_TA_EO	rms2_Gm_EO	rms0_TA_EC	rms0_Gm_EC	rms1_TA_EC	rms1_Gm_EC	rms2_TA_EC	rms2_Gm_EC	rms0_TA_BG	rms0_Gm_BG	rms1_TA_BG	rms1_Gm_BG	rms2_TA_BG	rms2_Gm_BG	rms0_TA_DR	rms0_Gm_DR	rms1_TA_DR	rms1_Gm_DR	rms2_TA_DR	rms2_Gm_DR
1	1	2.78142	17.0499	3.05255	20.4148	34.5634	4.84823	3.164	30.6007	3.47516	27.4864	64.1094	10.7013	2.91518	18.7145	2.97058	31.2409	60.2037	9.43023	2.67415	17.776	3.08732	17.1797	67.8908	8.84475
2	1	5.685	4.15281	5.93419	6.01423	113.743	28.653	10.7447	29.6959	15.6852	14.1997	95.1128	28.7957	7.6089	15.5864	8.34415	13.819	87.4735	28.9485	13.3818	21.2729	6.93807	5.52587	100.521	45.0177
3	1	1.92368	6.27536	1.77461	4.77693	127.041	19.3857	3.74933	5.42322	2.0672	6.32782	129.944	25.5253	2.00994	6.59256	1.87431	4.8958	118.539	15.7102	2.37579	9.2016	1.81785	7.64113	131.744	21.4958
4	1	4.58236	5.44158	5.06905	7.47559	66.5525	10.2363	3.53307	29.8076	3.04649	30.2296	106.025	13.9519	4.24937	29.8116	3.7376	24.6034	85.4023	13.5385	2.65029	15.2845	2.38166	14.8717	67.4167	9.69523
5	1	3.60359	5.82742	3.92932	9.87186	23.212	4.1856	3.79404	3.3767	3.12265	3.43884	33.8164	5.79621	3.69111	7.10328	4.1496	4.46874	33.3671	7.31346	3.63654	6.05554	3.62057	5.36599	42.3341	5.65529
6	1	6.46048	4.07182	5.7893	3.77671	40.8482	10.3759	6.55333	4.63935	5.68035	4.92687	51.5544	7.63592	7.4713	4.27381	6.4583	4.70456	43.9856	7.61393	4.96939	4.45964	5.68648	3.05856	45.6323	8.39636
7	1	4.75246	14.5777	3.8709	11.7503	149.888	16.7355	5.71537	19.8319	6.48455	7.58257	140.207	26.2494	6.2089	20.5923	6.29534	22.1931	133.769	32.8146	5.46497	12.8229	5.22366	15.8362	136.854	22.4583
8	1	3.05084	10.6904	4.11941	11.4177	30.1511	13.9675	3.17283	8.87927	3.52833	8.64933	37.3429	11.0024	3.2146	8.09823	3.65772	8.2512	44.1462	9.76102	2.93612	8.2451	3.281	10.4683	47.8086	10.232
9	1	3.23574	6.97132	3.04746	4.03136	39.5847	8.59176	3.15932	4.02277	3.27925	3.11868	40.9085	7.25087	3.83657	4.10802	3.51993	3.91578	53.0312	10.7909	3.83701	5.7855	3.31729	5.05178	58.2025	14.898
10	1	2.97843	5.13783	3.37395	7.99237	63.8987	11.5105	5.70818	6.68866	4.33142	5.95403	64.9177	9.71111	2.88436	8.6084	3.07369	8.45861	46.8919	13.0958	2.62595	7.19068	2.97017	9.13097	51.3698	9.88961
11	1	3.77683	4.36093	4.19204	5.24405	58.0095	8.55798	4.30501	4.0578	6.22027	4.32006	42.3411	6.35439	4.40063	4.46384	4.14749	4.70422	69.8473	8.75451	4.07896	4.77288	4.02755	3.91295	49.4818	7.06801
12	1	2.58693	7.38659	2.86144	4.89748	88.676	3.26351	2.43263	7.94288	3.43898	6.76318	57.0917	8.08785	2.41811	10.3866	2.80419	6.54024	50.7801	3.54372	2.57543	9.32783	2.33518	6.19727	35.536	5.61622
13	1	4.63381	4.32899	3.83878	3.78728	12.2064	6.45555	4.76508	4.92439	4.83535	4.04965	20.1089	7.16288	4.33199	10.8501	4.33743	9.64617	16.5363	13.8568	4.82922	11.8221	4.55474	6.44603	17.4658	14.0199
14	1	2.59928	19.2784	2.73628	19.0535	68.0309	12.5681	2.94462	41.0881	2.65748	30.5033	64.5663	32.248	2.80674	35.2871	2.68917	19.2505	67.502	24.0805	4.19049	27.5364	4.82126	14.4642	77.8335	20.9116
15	1	3.43822	14.7476	2.04453	6.68819	76.098	14.3634	2.27537	5.37023	2.55838	3.93514	114.933	9.57558	2.00282	7.9662	2.15177	4.51486	78.7817	7.04264	2.1687	8.24476	2.44139	2.96208	92.3087	11.0713
16	1	3.44104	14.0272	3.61227	8.57136	79.3273	10.8079	3.32725	12.5471	3.39452	16.7626	96.4625	13.0624	3.67797	17.875	3.22751	15.2017	70.7325	12.9372	3.62061	18.4613	3.59521	18.9812	100.846	17.8344
17	1	3.50189	6.70004	3.31122	5.9004	117.721	12.6906	3.86157	10.9235	3.95668	11.8872	98.4599	10.8237	3.92037	5.52958	3.46797	6.22501	86.6395	13.4129	3.50782	5.6045	4.14994	6.56706	91.2858	9.15118
18	1	2.91502	7.77571	2.84233	3.62871	40.3541	3.7322	3.42677	5.34053	3.40821	13.9446	77.2457	8.68457	3.76804	20.404	3.62359	14.311	68.4622	9.02007	3.21032	5.10805	2.76871	3.84493	91.3928	5.42637
19	2	4.98805	7.57248	3.69354	8.14372	51.0795	18.5318	5.93842	14.566	7.21755	12.4489	123.618	13.8839	4.29181	8.02359	4.71424	9.55946	91.4775	11.7513	4.5333	8.88973	5.00274	11.3887	109.154	10.2994
20	2	3.64884	15.6262	3.29135	16.5917	114.943	22.8756	3.46907	12.5123	2.69647	13.9991	170.797	12.9135	3.69777	17.3486	3.47254	18.1137	151.595	26.4129	4.00783	20.5771	4.34052	23.3063	169.093	24.6409
21	2	4.46783	8.27067	5.81615	6.24427	101.533	14.0314	8.36344	11.2349	3.52617	11.6046	97.1054	15.57	3.80161	9.88226	4.43485	6.22232	96.7082	15.4205	3.08936	10.1897	3.16847	10.0603	106.206	14.2659
22	2	5.13854	7.10537	4.48208	7.08677	130.726	4.84336	4.18365	21.4572	4.4694	15.4603	270.72	6.32438	4.02635	23.0141	4.23092	15.0035		9.83857	3.79528	19.0288	3.75973	19.7524	271.252	9.91642
23	2	5.76521	5.43946	6.15467	6.50556	75.5141	12.4066	6.80537	10.8418	11.5573	11.0775	125.504	16.4344	6.71718	5.84498	7.19093	5.6546	88.0199	9.55993	6.29822	9.16294	6.57931	9.3304	97.4648	11.4099
24	2	4.37573	5.42675	4.11737	6.2374	98.0833	7.55355	28.5294	11.5041	38.2656	10.4602	149.772	13.6429	5.81025	8.34497	22.6568	7.82939	124.728	13.2457	3.94079	6.52431	3.47985	7.88222	112.026	10.9152
25	2	6.44058	11.0851	4.07325	4.90714	167.406	9.39544	6.19155	8.41581	6.27322	8.88598	157.122	7.62809	9.18899	11.0787	10.8897	15.7925	151.445	13.3775	8.45228	7.08838	8.66856	7.15905	184.768	10.4737
26	2	5.00023	3.99216	5.50016	4.21373	156.599	6.03087	7.11289	4.07146	5.85719	5.09604	160.861	6.2172	6.38479	6.29833	6.22682	7.70252	160.106	7.87313	5.03966	4.47319	5.18005	5.51832	169.998	6.91584
27	2	3.06425	9.01756	3.19707	7.21571	74.6953	17.4648	3.03197	9.4243	3.1821	10.0351	97.8605	22.5346	3.1703	4.06098	4.23972	3.90399	95.7792	13.9366	3.03151	4.54077	3.05934	6.80848	100.267	17.3623
28	2	3.4113	10.8885	3.578	9.09135	117.967	14.9312	3.96486	9.24274	4.43359	9.12124	145.126	31.4019	4.43426	14.6301	3.85833	14.6819	123.125	14.502	3.5477	10.742	3.15212	19.3438	143.884	17.5965
29	2	8.69841	10.0921	5.3241	8.41616	87.4132	14.1115	9.80519	11.2026	9.2951	11.8795	105.679	17.173	10.6026	13.3576	11.1661	14.9951	103.197	21.2041	12.9318	14.2487	11.5631	12.4121	91.4762	19.7743
30	2	6.97187	11.9267	7.70475	12.3019	59.5938	18.685	6.50689	8.99997	6.13095	10.1443	73.7929	19.354	6.92909	11.5518	7.77431	8.01825	70.5972	21.7506	8.16265	15.1842	6.48725	12.4782	80.7718	40.0988
31	2	8.96965	7.658	6.88294	6.16774	43.2636	14.28	25.3047	10.6079	23.6708	9.63764	61.6818	22.6379	12.9261	9.49026	12.3796	12.9174	59.4943	24.7434	7.15448	5.65951	8.54455	6.32092	57.2255	16.6287
32	2	2.81632	4.03423	2.95888	4.0481	33.6815	5.63676	3.21843	5.675	2.88288	7.31803	33.1624	11.1799	2.952	7.72105	3.26351	9.86937	42.2172	6.58441	3.16112	5.61927	3.06281	3.16202	52.0559	9.11677
33	2	5.98047	7.07616	4.54832	6.61654	52.5277	10.4904	3.95993	5.73949	3.24848	7.12893	62.6972	12.8918	9.47916	7.92002	8.13431	8.35754	58.5342	14.8213	6.84422	7.46791	5.33024	8.22985	59.8605	12.342
34	2	8.19544	12.0144	7.58241	17.1714	82.6901	12.1321	8.17299	10.6854	8.36741	17.3178	89.3349	15.56	8.77472	16.6033	8.93577	14.7163	73.9396	18.3423	10.1462	20.2236	8.16119	13.4267	88.7891	14.2467
35	2	3.43848	10.2398	2.91593	12.4038	125.576	30.2333	4.81758	8.40307	6.73274	8.9985	140.349	23.189	5.85796	11.3853	6.36483	13.648	112.127	27.8303	4.00126	6.70584	6.10097	6.36414	94.197	18.2154
36	2	21.7922	6.74396	17.1776	6.60553	154.455	17.8539	21.5264	4.84099	11.7922	3.93662	192.641	8.99973			44.6675	16.8786	37.0587	33.0331
Legend
Group 1=Young
Group 2=Older
0=Interval 0
1=Interval 1
2=Interval 2
EO=Eyes open
EC=Eyes closed
BG=Blackout glasses
DR=Dark room

## Sheet: EMG Dynamic ML
Subject Nr	Group	rms0_TA_EO	rms0_Gm_EO	rms1_TA_EO	rms1_Gm_EO	rms2_TA_EO	rms2_Gm_EO	rms0_TA_EC	rms0_Gm_EC	rms1_TA_EC	rms1_Gm_EC	rms2_TA_EC	rms2_Gm_EC	rms0_TA_BG	rms0_Gm_BG	rms1_TA_BG	rms1_Gm_BG	rms2_TA_BG	rms2_Gm_BG	rms0_TA_DR	rms0_Gm_DR	rms1_TA_DR	rms1_Gm_DR	rms2_TA_DR	rms2_Gm_DR
1	1	2.80172	22.1467	2.82235	18.4092	30.5235	31.8593	2.73565	22.4554	2.83791	13.798	18.0695	33.9303	2.90717	26.9046	3.11569	25.0475	27.8144	43.4272	3.07013	17.5676	2.82622	15.8075	38.6379	23.1117
2	1	4.8532	8.6577	4.2881	3.58337	40.0568	63.4631	6.01032	7.81002	7.59955	3.03932	29.1807	35.9433	8.9717	10.0587	7.85975	4.89073	47.0619	64.1902	5.11583	8.31753	5.39826	9.69067	27.2177	51.4969
3	1	3.01073	6.06627	2.65136	7.3791	37.2947	20.1839	2.46713	9.47457	2.15143	13.8457	27.9009	16.9931	2.29582	4.67324	1.87994	4.86117	57.2231	18.7735	2.52006	15.2135	2.39847	12.3194	72.6061	31.6737
4	1	3.06739	12.691	2.69837	9.52828	16.6859	14.6035	5.13644	18.8838	2.55809	11.3976	13.5976	20.5517	3.99442	29.7059	3.96411	29.9784	30.8529	34.3122	4.50938	15.6145	4.0189	18.3757	41.4816	60.0117
5	1	3.57644	3.59523	3.35897	4.06201	9.33075	25.9388	3.71923	5.07576	3.7328	6.34027	5.86605	27.2829	3.35709	5.20995	3.93975	6.60696	15.4842	32.8143	3.67268	7.19665	3.78295	6.54938	9.93308	26.5585
6	1	6.46491	3.81199	7.09353	3.87515	35.2236	21.2294	6.74621	3.68355	5.22871	4.23733	32.9943	16.6983	6.36292	4.66344	6.63609	4.44887	29.7652	8.58216	5.34775	5.10384	5.63383	3.77556	29.7558	15.7172
7	1	7.46875	9.56052	6.9143	4.28149	72.0561	75.0774	4.92365	13.7297	4.33132	16.0745	69.2835	82.3094	6.07495	4.57969	7.52637	4.91234	85.9943	116.712	5.61927	21.756	5.39301	16.0907	80.7731	94.6425
8	1	3.32021	9.15292	3.03377	9.44328	19.7927	21.182	3.32708	9.15437	3.20679	8.8366	24.4741	18.3966	3.32666	8.86149	2.95337	10.7989	17.7413	16.5151	3.22287	9.04953	3.03241	9.38052	28.8364	32.7701
9	1	3.36513	4.66828	4.13255	4.2843	16.6663	20.224	3.21422	4.51763	3.52984	4.9752	23.4082	32.4483	3.70017	4.04093	3.32891	4.21178	16.8007	16.6028	3.48945	3.79323	3.3019	4.3505	20.656	28.4603
10	1	3.93035	7.94638	4.01572	6.42236	26.5704	30.8583	5.77851	6.3088	4.00331	4.35815	42.8703	39.0326	2.63199	9.18864	2.82799	11.0743	47.9276	40.0956	3.22644	7.80847	3.0406	6.98166	48.3355	36.0913
11	1	4.35144	4.62897	4.52539	4.10001	18.9964	27.1809	4.9054	4.73437	4.99008	3.90969	24.091	30.6906	3.84847	3.98833	3.78152	5.02019	29.117	25.7149	3.67506	3.67185	4.51822	4.75579	27.3197	33.4826
12	1	2.36954	3.53302	2.37302	3.54517	49.6035	4.65734	2.42407	16.4638	14.7721	10.0764	29.4452	17.842	2.55502	8.5851	2.4666	6.81863	68.6971	6.3564	2.288	7.12182	2.09426	3.07134	51.2903	3.24868
13	1	4.69119	4.61468	4.90647	4.52278	5.96282	40.6557	4.37488	10.84	4.31327	10.505	7.4843	57.3018	4.57579	5.58938	4.45693	6.61366	6.17844	44.5993	4.45191	13.324	5.10402	19.9526	6.1416	58.5895
14	1	2.72728	17.3012	2.65359	12.8463	28.3053	46.3872	2.67625	29.9888	8.88709	21.6384	41.242	70.6364	3.88084	22.0299	3.27213	23.3549	23.893	50.2542	2.61578	31.7054	2.35256	35.5622	65.6951	113.906
15	1	2.60881	4.57255	2.75433	4.58739	23.9122	9.92392	3.036	3.81268	2.49907	3.79811	49.0442	8.17544	2.07462	3.71616	2.3556	3.688	33.4058	6.9379	2.52266	4.06437	2.24391	4.09048	39.26	6.18615
16	1	3.30287	6.90111	4.08784	6.89498	23.2791	19.404	3.41972	14.4327	3.20322	9.83534	27.185	17.8759	3.13947	5.41361	3.2885	8.74815	65.6355	18.6507	3.27379	5.32306	3.25264	12.2191	28.29	39.6102
17	1	3.53203	4.31743	4.08756	5.11271	23.5686	29.3919	3.50216	9.19967	3.34168	8.20246	47.0038	75.2896	3.81771	8.59882	4.80967	14.1736	57.617	58.1758	3.65333	8.23044	4.13675	7.52155	26.337	42.4877
18	1	3.09307	3.04236	3.22705	2.80178	9.90132	5.96427	3.25621	3.22053	2.62691	3.26865	31.7167	10.312	3.10118	28.0579	3.3154	18.2254	10.8616	31.8959	3.16704	9.12619	3.30307	10.1313	4.76968	24.134
19	2	5.26004	6.61961	4.56409	15.2055	48.3303	21.5357	4.52234	8.26662	8.61012	9.02682	71.1291	15.4059	5.17234	8.61813	5.19027	10.8608	69.0044	23.4981	4.86169	13.4975	5.01271	7.7317	99.1611	28.1051
20	2	3.44438	11.1152	3.23137	13.0002	114.665	28.6113	2.89587	14.0027	2.57847	13.3585	53.5934	37.2529	3.7384	19.4582	3.1642	17.8247	91.0607	31.2063	3.38633	17.7274	2.79372	15.7285	77.456	35.3338
21	2	3.51454	11.5101	3.53754	11.4665	48.8121	18.7724	4.43583	9.41564	5.31885	16.5687	48.2033	18.8484	4.92286	6.73399	3.33212	6.24392	59.98	24.261	5.43763	7.88859	8.74299	5.33773	79.3043	57.0904
22	2	4.1445	6.34385	4.68363	5.50279	61.0715	40.8722	50.1928	14.448	43.1895	11.8057	119.444	55.6999	3.57387	20.7508	3.92918	10.3914	76.2036	65.1311	5.7688	28.3707	5.54514	17.7138	138.219	79.0294
23	2	5.13135	7.99445	5.81735	5.96304	49.6003	60.0416	4.77935	9.4251	4.80849	6.26453	38.801	55.381	6.37459	7.13094	5.90885	6.486	64.6036	46.9849	5.39923	6.24066	8.34694	6.1019	73.8357	72.4751
24	2	26.4269	10.2648	30.7041	9.6408	142.203	25.8148	27.31	9.73416	24.6534	7.82445	125.668	29.4284	23.5773	8.98131	17.4431	9.91231	150.327	26.577	29.0006	10.842	25.1168	11.6416	152.882	29.2425
25	2	3.88061	5.1107	3.64688	4.18632	102.726	44.4086	4.3218	7.78118	4.7731	7.23864	119.979	80.6302	8.05173	6.38744	10.267	3.08702	130.973	47.0428	6.66877	4.86171	5.12015	12.3299	129.62	35.2649
26	2	5.0218	4.29975	4.95928	3.80383	106.807	26.901	4.27265	5.12771	4.68469	6.76871	64.6066	29.8888	6.67811	4.8801	6.15662	6.44102	93.6135	32.9672	5.37164	4.16422	4.55928	5.61062	88.3277	24.4466
27	2	3.19095	4.78885	3.11065	3.81769	27.4168	33.377	2.92695	7.12711	2.90037	9.13347	38.7069	39.4677	3.47568	3.76777	3.39945	3.80424	41.3735	20.6735	3.13057	4.67539	3.41655	3.39992	64.3909	18.6729
28	2	5.19436	9.1805	3.91814	8.70192	35.0004	20.7117	4.03002	10.9813	3.76532	15.1888	105.918	30.8883	6.4872	12.0494	3.83433	10.3661	97.1809	33.2011	3.70301	10.4816	3.5519	12.9012	74.2192	26.6527
29	2	8.86413	10.8492	7.71177	11.3322	32.7395	31.4764	9.59717	11.7979	9.64727	11.0406	50.7037	42.6307	8.84096	11.2173	8.07151	9.45796	43.0879	37.1923	17.6111	9.00933	17.733	17.5398	60.7893	43.0886
30	2	6.91649	12.0188	7.34755	11.5205	59.4933	35.1846	8.4421	12.8992	10.1312	12.9651	46.1104	45.8275	6.37497	8.83726	6.22685	9.26047	62.8437	33.5539	5.38918	10.1975	5.38442	9.16448	56.5274	33.7881
31	2	20.8472	8.3201	18.5905	6.76818	29.4424	33.2993	32.7072	10.1602	25.2578	10.3091	52.5005	34.4707	5.91792	8.27092	6.5779	6.79621	44.6401	26.9358	8.61837	6.87601	7.09532	8.11714	47.0242	34.0096
32	2	3.07574	3.34961	3.34683	3.53901	20.4863	9.59983	3.31219	3.98918	3.42683	4.11587	21.9499	27.5388	3.07358	3.27792	3.69939	3.03939	30.9595	13.503	3.68589	4.18311	5.05106	8.53135	36.6043	17.1863
33	2	4.1594	6.21515	3.82264	5.98049	39.1175	17.3611	4.99368	5.80961	4.32437	4.97204	41.2542	24.1602	6.08804	9.88198	8.11813	7.83578	56.9802	25.8447	6.7271	5.40277	6.55095	7.16646	45.3474	21.727
34	2	11.6085	19.5904	12.9717	16.6897	48.7566	30.6931	9.49362	13.3925	9.03637	17.2314	47.4846	25.2082	11.4595	15.6389	9.87644	11.6177	54.9873	27.7849	8.86228	11.836	7.69191	11.0666	45.3862	23.0126
35	2	3.20189	7.16557	3.50811	7.52255	66.3536	26.4017	4.22153	9.32681	4.57769	8.42173	74.1944	39.0989	5.03348	9.67049	4.37885	9.86149	102.198	45.8746	4.1806	7.39072	7.95355	8.12781	67.9285	30.9897
36	2	35.4701	2.95913	19.0548	3.19518	92.0694	22.7091	59.5915	4.19074	55.7923	7.66884	127.765	39.6535	17.6335	3.75452	23.5437	4.3757	113.531	30.7347
Legend
Group 1=Young
Group 2=Older
0=Interval 0
1=Interval 1
2=Interval 2
EO=Eyes open
EC=Eyes closed
BG=Blackout glasses
DR=Dark room

## Sheet: Fig 3 EMG Static
Subject Nr	Group	rms_TA_EO	rms_Gm_EO	rms_TA_EC	rms_Gm_EC	rms_TA_BG	rms_Gm_BG	rms_TA_DR	rms_Gm_DR
1	1	2.83064	9.96975	2.93298	16.0851	2.93954	21.174	2.86632	13.9608
2	1	4.64043	8.0369	4.10637	8.06563	3.85509	6.87454	5.38531	7.79517
3	1	2.64017	7.43548	3.07809	7.79886	2.99187	7.6594	2.38748	6.10222
4	1	6.39348	13.2343	7.12625	11.8935	6.92383	15.8854	6.58014	11.4182
5	1	3.24391	13.4246	6.39537	15.9702	3.288	16.0797	3.83818	15.2897
6	1	11.7727	5.69635	14.7163	7.09177	13.6441	6.0924	11.0982	5.46873
7	1	5.29927	8.33278	6.02013	11.0839	6.19167	16.6057	6.60642	14.3182
8	1	5.11278	13.7124	4.2863	11.0324	4.69501	10.6686	4.05572	9.44636
9	1	2.15886	7.71357	2.14399	11.8293	3.24406	11.4651	2.16268	9.26006
10	1	7.42591	11.2358	9.38617	8.07848	7.46566	13.7987	6.92978	9.5248
11	1	10.8652	7.05134	9.55536	4.03458	9.29604	5.08277	7.18011	4.18154
12	1	6.21742	5.56548	3.49593	7.45354	2.88492	7.11889	3.61076	8.23275
13	1	16.2638	7.79297	11.3292	11.5839	6.07505	12.169	17.4865	9.98507
14	1	3.43565	9.53746	3.02114	6.57842	3.03176	9.77816	3.28899	4.98806
15	1	5.3356	13.9892	3.29957	18.2478	3.70106	8.26065	3.39763	7.10792
16	1	4.58843	10.642	5.00399	9.32292	3.42214	12.4563	3.20564	11.7321
17	1	3.14599	3.34708	3.10303	3.72502	3.09496	3.52241	3.12922	3.48259
18	1	3.69431	9.0618	3.7617	10.4846	3.7538	9.21254	3.77472	9.71719
19	1	3.51606	16.0874	3.72389	29.4432	3.47143	25.7	3.52959	30.8805
20	2	5.7256	12.7527	7.71939	14.6162	5.87204	13.144	6.49054	13.8132
21	2	6.75603	11.7488	9.15938	13.1691	8.24864	13.9144	8.80497	15.0437
22	2	4.7408	9.42121	7.62353	9.20662	7.07332	9.29483	13.8303	10.0417
23	2	3.86561	28.1552	3.8649	33.0097	3.99121	34.1715	6.04964	34.1198
24	2	6.4964	17.8477	10.0174	19.9707	10.2222	19.1937	8.44436	19.2795
25	2	16.2928	8.53612	47.7288	11.8203	42.2766	12.0553	36.0444	11.0202
26	2	10.2708	7.89103	16.9023	10.6577	13.3676	11.0305	10.6638	10.6145
27	2	8.17216	4.83005	6.7317	6.17886	8.0494	5.59132	7.34546	5.75254
28	2	16.0924	12.707	14.9656	15.772	8.27788	12.7083	8.05314	15.3342
29	2	5.6608	9.59461	6.01858	12.5118	7.2715	10.478	5.49553	11.1774
30	2	5.11219	9.6938	5.6277	9.60936	5.24387	9.40781	6.11656	11.2931
31	2	5.77623	5.43819	5.46693	6.17832	5.6687	5.71692	5.8692	6.4701
32	2	11.6946	11.9124	9.45601	8.47378	10.8761	12.5271	8.24446	7.74401
33	2	4.18394	6.13194	4.03464	6.02175	4.95216	5.72513	4.81383	7.19461
34	2	8.36296	11.4826	7.67709	13.5944	17.8253	9.83656	6.67864	11.6977
35	2	7.70616	9.05046	75.7383	6.95428	48.3011	11.627	49.1403	9.72063
Legend
Group 1=Young
Group 2=Older
EO=Eyes open
EC=Eyes closed
BG=Blackout glasses
DR=Dark room
